# Supplementary material
Source: PubMed Central journal article supplement (PMC7097088)
Supplement: 41588_2006_BFng1698_MOESM1_ESM.pdf [file 41588_2006_BFng1698_MOESM1_ESM.pdf]

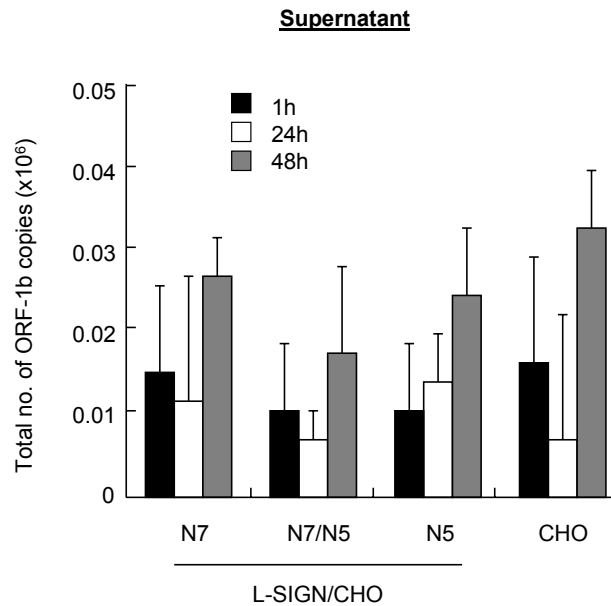

**Supplementary Figure 1. Reduction of the total SARS-CoV ORF-1b copy numbers is not due to viral dissociation from L-SIGN.**

N7, N7/N5 and N5 L-SIGN transfected CHO cells and mock transfectants were pulsed with 1 pfu/cell SARS-CoV. After washing, cells were further incubated for 24h and 48h, and the viral ORF-1b copy numbers were determined separately in the cell lysates and in the supernatant. Compared with the total (**Fig. 2b**) measured from both cell lysates and supernatant, ORF-1b copy numbers measured from the supernatant were extremely low. Data are expressed as mean  $\pm$  SD from triplicates and are representative of 3 experiments. Note that the scale of the Y axis here is much smaller than that in **Fig 2b**.
