# Supplementary material
Source: PubMed Central journal article supplement (PMC7097088)
Supplement: 41588_2006_BFng1698_MOESM2_ESM.pdf [file 41588_2006_BFng1698_MOESM2_ESM.pdf]

a.

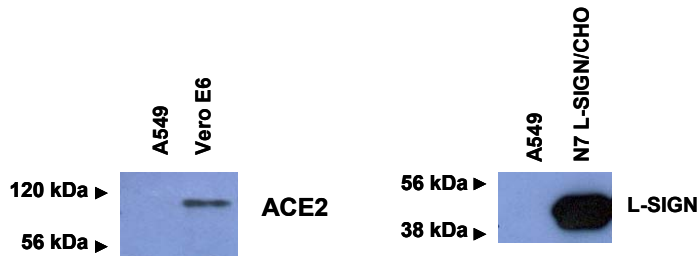

b.

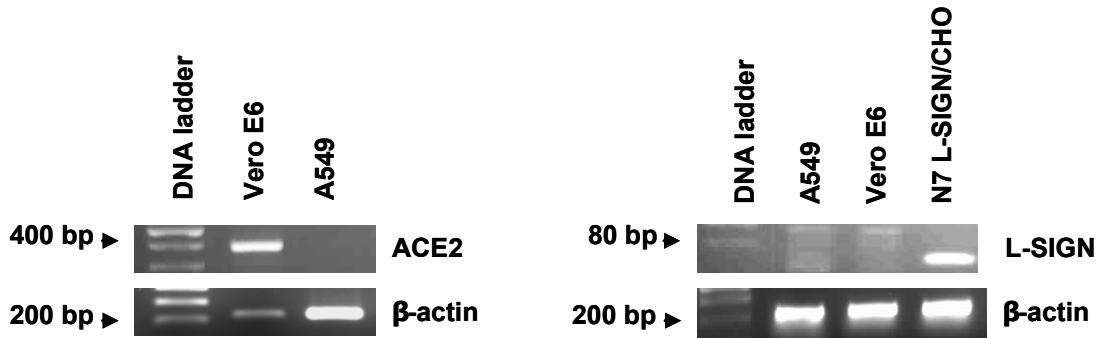

c.

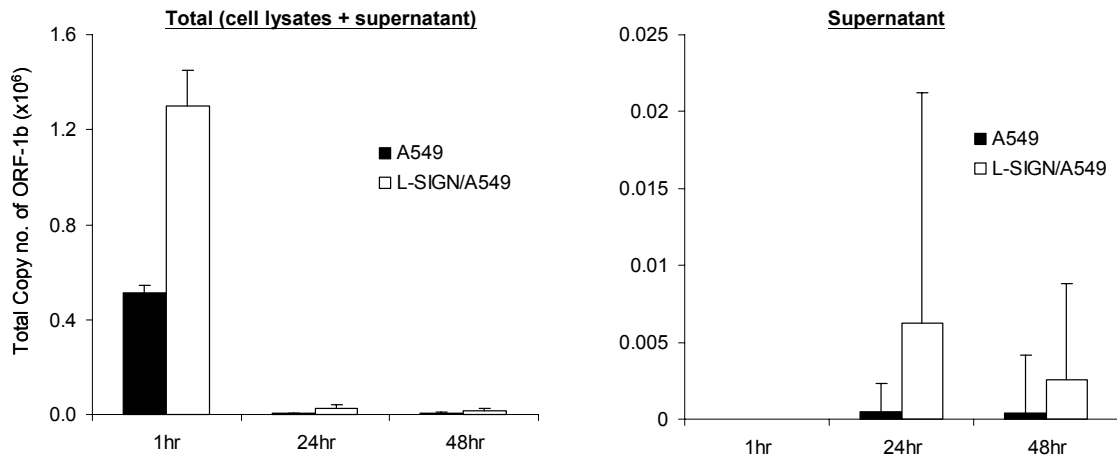

d.

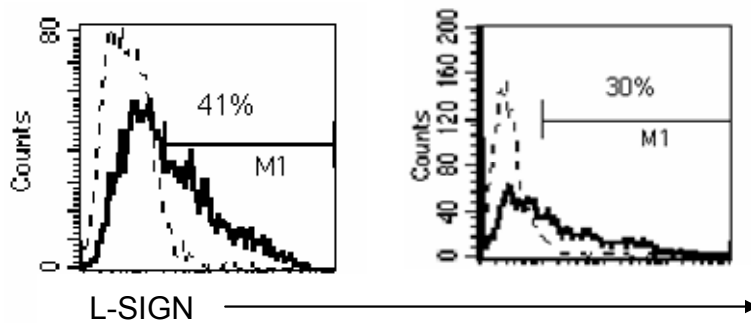

**Supplementary Figure 2. A549 cells do not express ACE2 and L-SIGN, and SARS-CoV binding to L-SIGN-transfected A549 cells also underwent degradation over time.**

(a) Western blotting for protein expression of ACE2 (left panel) and L-SIGN (right panel) in A549 cells with Vero E6 cells and N7 L-SIGN transfected CHO cells as a positive control respectively. (b) RT-PCR for mRNA expression of ACE2 (left panel) and L-SIGN (right panel) in A549 cells with Vero E6 cells and N7 L-SIGN transfected CHO cells as a positive control respectively. Data are representative of 3 experiments. (c) N7 L-SIGN transfected A549 and mock transfected cells were pulsed with 1 pfu/cell SARS CoV. After washing, cells were further incubated for 24h and 48h before harvest for the quantification of the viral ORF-1b. Total ORF-1b copy numbers (cell lysates + supernatant) and those in the supernatant were shown in the left and right panels respectively. Data are expressed as mean  $\pm$  SD from triplicates and are representative of 3 experiments. (d) L-SIGN expression on N7 L-SIGN transfected A549 cells on post-transfection day 2 from two independent experiments. Transfection of L-SIGN in A549 cells was less efficient in comparison to that in CHO cells (see **Supplementary Fig. 4**). Solid line: anti-L-SIGN antibody; dash line: isotype control antibody.

**Methods for RT-PCR and western blotting:**

Total RNA extracted from Vero E6, A549 and N7 L-SIGN/CHO cells was reverse-transcribed into cDNA. A 388 bp fragment of the ACE2 transcript was PCR-amplified using specific primers (forward primer: 5'-CCCTTTGGACAGAAACCAAA-3'; reverse primer: 5'-GGCTGCAGAAAGTGACATGA-3') with a PCR condition of 30s at 94°C, 30s at 55°C and 30s at 72°C for 40 cycles. The 60 bp fragment of the L-SIGN transcript was amplified using specific primers (forward primer: 5'-CAACAACCAGTGGCATCAGA-3' and reverse primer: 5'-GGCCATGTATCTGCTGGAAT-3') with a PCR condition of 30s at 94°C, 30s at 55°C and 30s at 72°C for 40 cycles. For internal control, a 229 base-pair fragment of  $\beta$  actin was amplified using forward (5'-CCCAAGGCCAACCGCGAGAAG-3')

and reverse primer (5'-GTCCCGGCCAGCCAGGTCCAG-3') with 15s at 94°C, 15s at 65°C and 20s at 72°C for 35 cycles. For Western blotting, cellular protein was extracted and analyzed with SDS-PAGE electrophoresis. The ACE2 expression was detected using 1 µg/ml mouse anti-human ACE2 monoclonal Ab (clone 171606, R&D Systems Inc., USA). The L-SIGN expression was detected using 1 µg/ml mouse monoclonal antibody directed against the neck domain of the human L-SIGN/DC-SIGN (clone DC28, NIH Aids Research Program, USA).
