# Supplementary material
Source: PubMed Central journal article supplement (PMC7097088)
Supplement: 41588_2006_BFng1698_MOESM3_ESM.pdf [file 41588_2006_BFng1698_MOESM3_ESM.pdf]

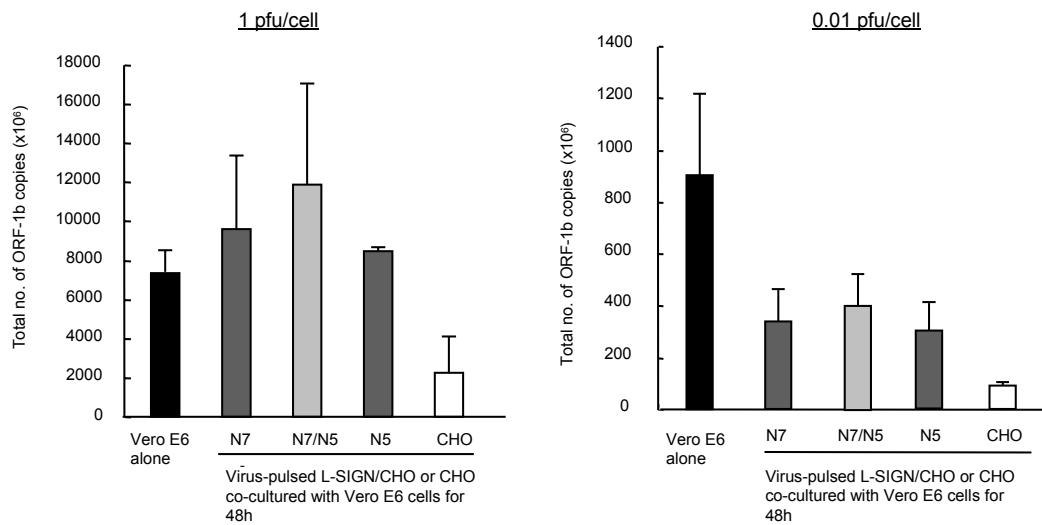

**Supplementary Figure 3. L-SIGN delivered SARS-CoV to Vero E6 cells in trans, but no difference was noted among N7, N7/N5 and N5 L-SIGN transfectants after 48h incubation.**

N7, N7/N5 and N5 L-SIGN transfected L-SIGN CHO cells and mock transfectants were pulsed with 1 pfu/cell (left panel) or 0.01 pfu/cell (right panel) SARS CoV for 1h at 37°C. After extensive washing, cells were co-cultured with Vero E6 cells for 24h (results shown in **Fig. 3a**) and 48h (shown as above) before determination of the total viral ORF-1b copy number. Data are expressed as mean  $\pm$  SD from triplicates and are representative of 3 experiments.
