# Supplementary material
Source: PubMed Central journal article supplement (PMC7097088)
Supplement: 41588_2006_BFng1698_MOESM6_ESM.pdf [file 41588_2006_BFng1698_MOESM6_ESM.pdf]

a.

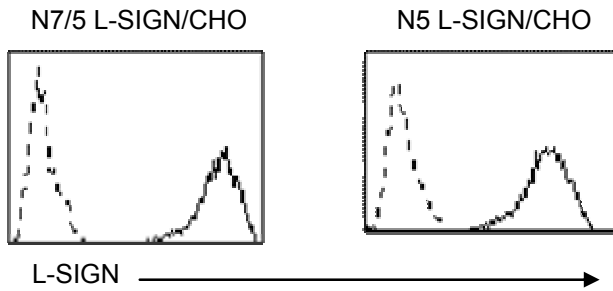

b.

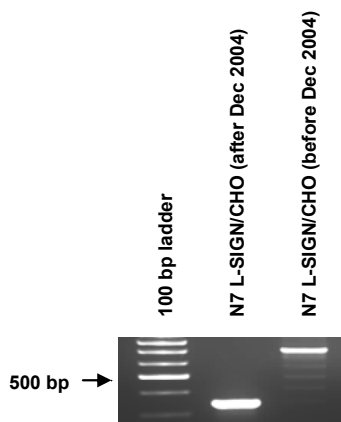

c.

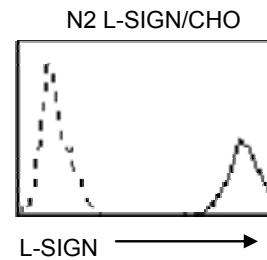

d.

• 191 CAGGGTGTCT TGGCCATGGC GCCCTGGTGC TGCAACTCCT CTCCTTCATG CTCTTGGCTG 240

• 241 GGGTCCTGGT GGCCATCCTT GTCCAAGTGT CCAAGGTCCC CAGCTCCCTA AGTCAGGAAC 300

• 301 AATCCGAGCA AGACGCAATC TACCAGAACC TGACCCAGCT TAAAGCTGCA GTGGGTGAGC 360

• 361 TCTCAGAGAA ATCCAAGCTG CAGGAGATCT ACCAGGAGCT GACCCAGCTG AAGGCTGCAG 420

• 421 TGGGTGAGTT GCCAGAGAAA TCCAAGCTGC AGGAGATCTA CCAGGAGCTG ACCCGGCTGA 480

• 481 AGGCTGCAGT GGGTGAGTTG CCAGAGAAAT CCAAGCTGCA GGAGATCTAC CAGGAGCTGA 540

• 541 CCCGGCTGAA GGCTGCAGTG GGTGAGTTGC CAGAGAAATC CAAGCTGCAG GAGATCTACC 600

• 601 AGGAGCTGAC GGAGCTGAAG GCTGCAGTGG GTGAGTTGCC AGAGAAATCC AAGCTGCAGG 660

• 661 AGATCTACCA GGAGCTGACC CAGCTGAAGG CTGCAGTGGG TGAGTTGCCA GAGAAATCCA 720

• 721 AGCTGCAGGA GATCTACCAG GAGCTGACCC AGCTGAAGGC TGCAGTGGGT GAGTTGCCAG 780

• 781 ACCAGTCCAA GCAGCAGCAA ATCTATCAAG AACTGACCGA TTTGAAGATC GCATTTGAAC 840

• 841 GCCTGTGCCG CCACTGTCCC AAGGACTGGA CATTCTTCCA AGGAAACTGT TACTTCATGT 900

• 901 CTAACTCCCA GCGGAACTGG CACGACTCCG TCACCGCCTG CCAGGAAGTG AGGGCCCAGC 960

e.

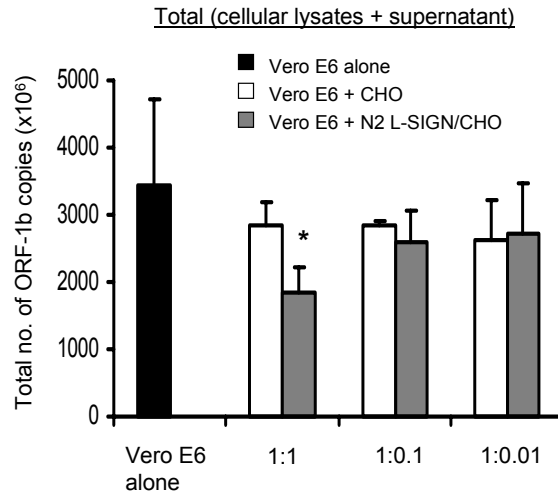

**Supplementary Figure 6. Co-cultures of stable clones of homozygous L-SIGN/CHO cells with Vero E6 cells in a closed infection system resulted in a reduced final SARS-CoV titer.**

(a) L-SIGN expression on stable transfectants N5 and heterozygous N7/5 L-SIGN transfected CHO cells (L-SIGN/CHO) used in **Fig. 5**.  $1 \times 10^5$  cells were stained with monoclonal mouse anti-human L-SIGN antibody (clone 120604, from AIDS Research Programme, NIH, USA, shown as solid line) or isotype control antibody (dash line). Data are representative of 3 experiments. (b) After prolonged culture, the original stable N7 L-SIGN transfected CHO cells had lost 5 tandem repeats in their mRNA and carried only 2-repeats in the exon 4. RT-PCR of the RNA from the non-truncated N7 L-SIGN stable clone selected in July 2004, using the forward and reverse primers (underlined sequences in black) designed to amplify the neck region, yielded a PCR fragment of 683bp. In contrast, RT-PCR in Dec 2004 gave rise to a fragment of 338bp, indicating N7 truncation. The PCR conditions for these primers were 30s at 94°C, 30s at 60°C and 60s at 72°C for 30 cycles. (c) L-SIGN expression on stable transfectants N7 L-SIGN transfected CHO cells (L-SIGN/CHO) that had lost 5 tandem repeats in exon 4 (N2).  $1 \times 10^5$  cells were stained with monoclonal mouse anti-human L-SIGN antibody (clone 120604, from AIDS Research Programme, NIH, USA, shown as solid line) or isotype control antibody (dash line).

Data are representative of 3 experiments. (d) The tandem-repeat region of N7 L-SIGN DNA comprises of 7 and a half repeats of 69 nucleotides from nucleotide 318 to 846 (shown in red) analysed from the original N7 L-SIGN/CHO stable clone selected in our laboratory. However, this N7 L-SIGN/CHO stable clone has 5 repeats deleted from nucleotide 360 to 704 (in bold and underlined) without a frame shift noticed when examined in Dec 2004, and only expressed 2-repeats (N2). (e) Co-culture of  $1 \times 10^4$  Vero E6 cells with  $1 \times 10^4$ ,  $1 \times 10^3$ , or  $1 \times 10^2$  N2 L-SIGN/CHO stable transfectants (at a ratio of 1:1, 1:0.1, and 1:0.01) in 96-well plate, followed by infection with 0.01 pfu *per* Vero E6 cell, and cultured for 48h. No wash procedures were conducted all along in this experiment. A significant reduction of the final total viral ORF-1b copy numbers at 48h was demonstrated at a co-culture ratio 1:1. Data are expressed as mean  $\pm$  SD from triplicate and are representative of 3 experiments. \*:  $p < 0.05$  in comparison to co-cultures of Vero E6 with CHO cells at 1:1.
