# Supplementary material
Source: PubMed Central journal article supplement (PMC7097088)
Supplement: 41588_2006_BFng1698_MOESM8_ESM.pdf [file 41588_2006_BFng1698_MOESM8_ESM.pdf]

**Supplementary Table 1. Genotype and allele frequencies of *L-SIGN* in Chinese random controls and Caucasians of European descent (CEPH).**

**a**

| Genotypes | Chinese random controls | (%)    | CEPH <sup>#</sup> | (%)    |
|-----------|-------------------------|--------|-------------------|--------|
| 5/5       | 10                      | (2.6)  | 2                 | (3.4)  |
| 5/9       | 15                      | (3.9)  | 2                 | (3.4)  |
| 6/5       | 4                       | (1.0)  | 3                 | (5.2)  |
| 6/6       | 2                       | (0.5)  | 2                 | (3.4)  |
| 6/9       | 4                       | (1.0)  | 0                 | (0.0)  |
| 7/4       | 0                       | (0.0)  | 4                 | (6.9)  |
| 7/5       | 63                      | (16.6) | 17                | (29.3) |
| 7/6       | 25                      | (6.6)  | 10                | (17.2) |
| 7/7       | 191                     | (50.3) | 15                | (25.9) |
| 7/8       | 0                       | (0.0)  | 0                 | (0.0)  |
| 7/9       | 60                      | (15.8) | 3                 | (5.2)  |
| 9/9       | 6                       | (1.6)  | 0                 | (0.0)  |
| Total     | 380                     |        | 58                |        |

**b**

| Alleles | Chinese random controls | (%)    | CEPH <sup>#</sup> | (%)    |
|---------|-------------------------|--------|-------------------|--------|
| 4       | 0                       | (0.0)  | 4                 | (3.4)  |
| 5       | 102                     | (13.4) | 26                | (22.4) |
| 6       | 37                      | (4.9)  | 17                | (14.7) |
| 7       | 530                     | (69.7) | 64                | (55.2) |
| 8       | 0                       | (0.0)  | 0                 | (0.0)  |
| 9       | 91                      | (12.0) | 5                 | (4.3)  |

**c**

| Genotypes     | Chinese random controls | (%)    | CEPH <sup>#</sup> | (%)    |
|---------------|-------------------------|--------|-------------------|--------|
| Heterozygotes | 171                     | (45.0) | 39                | (67.2) |
| Homozygotes   | 209                     | (55.0) | 19                | (32.8) |

(a) *L-SIGN* genotypes were in HWE in the Chinese random controls (see Table 1 of the article) and the CEPH group (Hardy-Weinberg Exact Tests,  $p=0.797$  by Markov chain method). There is significant difference in genotype frequencies between the two groups: CLUMP  $T_1=59.87$ ,  $p<0.0001$  by CLUMP.

(b) There is significant difference in allele frequencies between Chinese random controls and Caucasians of European descent (CEPH): CLUMP  $T_1 = 55.96$ ,  $p < 0.0001$  by CLUMP.

(c) There is also significant difference in the frequencies of heterozygotes and homozygotes between Chinese and Caucasians of European descent:  $\chi^2_{1}=9.97$ ,  $p=0.002$

<sup>#</sup>Caucasian of European descent samples analyzed were obtained from CEPH Reference Families after exclusion of genetically related individuals.
