# Supplementary material
Source: PubMed Central journal article supplement (PMC7097088)
Supplement: 41588_2006_BFng1698_MOESM9_ESM.pdf [file 41588_2006_BFng1698_MOESM9_ESM.pdf]

Supplementary table 2: List of primers used.

| <b>Assays</b>                                                                   | <b>Primer name</b>       | <b>Primer sequence (5' – 3')</b>        |
|---------------------------------------------------------------------------------|--------------------------|-----------------------------------------|
| PCR for genotyping L-SIGN tandem repeats                                        | <i>L-SIGN</i> -Ex4-F (*) | CCCTAAGTCAGGAACAATCCGA                  |
|                                                                                 | <i>L-SIGN</i> -Ex4-R (*) | TCACAGGGGAGGAAACTGAG                    |
| PCR for N5 L-SIGN expression vector construction                                | exon4-F                  | CCCTAAGTCAGGAACAATCCG                   |
|                                                                                 | exon4-R                  | CAAATGCAGTCTTCAAATCGGTCA                |
|                                                                                 | exon1/BamHI-F            | CGGGATCCGAAAACATGAGTGACTCCAAGG          |
|                                                                                 | exon4/partial-R          | AGCTTTAAGCTGGGTCAGGTTCTGGTAGATTGCGTCTTG |
|                                                                                 | exon4/partial-F          | AATCTATCAAGAAGTACCGGATTTGAAGAC          |
|                                                                                 | exon7/stop-R             | CTATTCGTCTCTGAAGCAGGCTGC                |
| qRT-PCR for SARS-CoV ORF-1b gene                                                | coro3 #                  | TACACACCTCAGCGTTG                       |
|                                                                                 | coro4 #                  | CACGAACGTGACGAAT                        |
| qRT-PCR for SARS-CoV nucleocapsid gene                                          | forward                  | AGAAGGCATCGTATGGGTTG                    |
|                                                                                 | reverse                  | AGCGAGAAGAGGCTTGACTG                    |
| RT-PCR for ACE2 expression                                                      | ACE2-F                   | CCCTTTGGACAGAAACCAA                     |
|                                                                                 | ACE2-R                   | GGCTGCAGAAAGTGACATGA                    |
| RT-PCR for L-SIGN expression@                                                   | L-SIGN-F                 | CAACAACCAGTGGCATCAGA                    |
|                                                                                 | L-SIGN-R                 | GGCCATGTATCTGCTGGAAT                    |
| RT-PCR for $\beta$ -actin expression                                            | actin-F                  | CCCAAGGCCAACCGCGAGAAG                   |
|                                                                                 | actin-R                  | GTCCCGGCCAGCCAGGTCCAG                   |
| RT-PCR to determine the number of tandem repeats in L-SIGN stable transfectants | forward                  | GGCCATCCTT GTCCAAGTGT                   |
|                                                                                 | reverse                  | TGACGGAGTCGTGCCAGTTC                    |

(\*) F: forward; R:reverse

#: Poon LL et al. Rapid diagnosis of a coronavirus associated with severe acute respiratory syndrome. Clin Chem 49: 953-5 (2003)

@: specific for L-SIGN and no amplification of DC-SIGN
